# Supplementary material for: Clostridioides difficile specific DNA adenine methyltransferase CamA squeezes and flips adenine out of DNA helix
Source: PubMed Central journal article supplement (PMC8187626; doi:10.1038/s41467-021-23693-w), 2021-06-08
Supplement: 41467_2021_23693_MOESM1_ESM.pdf [file 41467_2021_23693_MOESM1_ESM.pdf]

Supplementary Information

Zhou et al.

***Clostridioides difficile* specific DNA adenine methyltransferase CamA squeezes and flips adenine out of DNA helix**

Jujun Zhou<sup>1,3</sup>, John R. Horton<sup>1,3</sup>, Robert M. Blumenthal<sup>2</sup>, Xing Zhang<sup>1,\*</sup>, Xiaodong Cheng<sup>1,\*</sup>

<sup>1</sup>Department of Epigenetics and Molecular Carcinogenesis, University of Texas MD Anderson Cancer Center, Houston, TX 77030, USA

<sup>2</sup>Department of Medical Microbiology and Immunology, and Program in Bioinformatics, The University of Toledo College of Medicine and Life Sciences, Toledo, OH 43614, USA

<sup>3</sup>These authors contributed equally: J.Z. and J.R.H.

\* Correspondence: XZhang21@mdanderson.org or XCheng5@mdanderson.org

Email addresses:

JZ (JZhou12@mdanderson.org); JRH (JRHorton@mdanderson.org);

RMB (Robert.Blumenthal@utoledo.edu); XZ (XZhang21@mdanderson.org);

XC (XCheng5@mdanderson.org)

Seven figures and one table

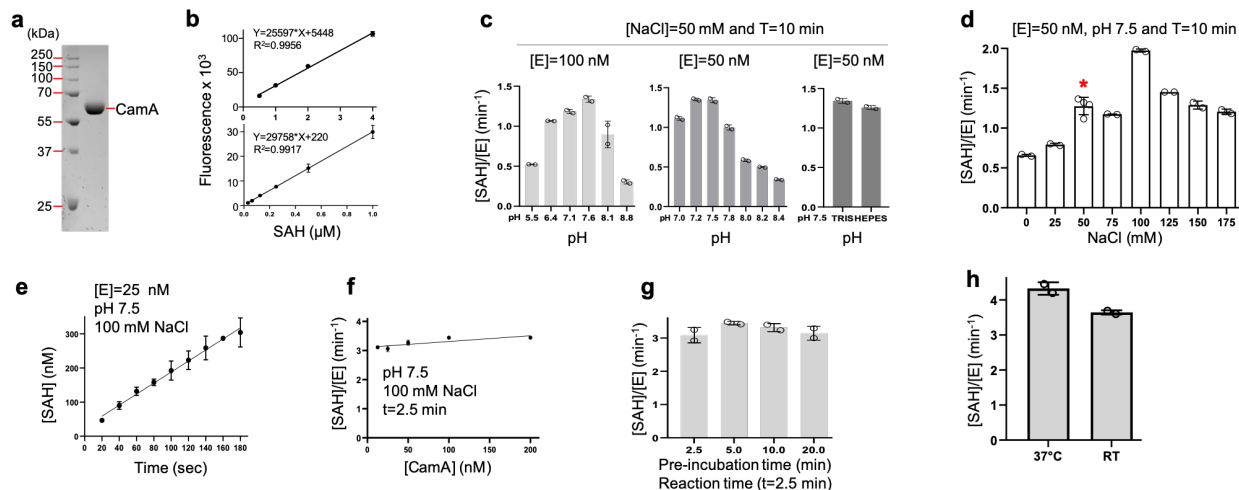

**Supplementary Fig. 1** CamA enzymatic activity. **a** Example of purified recombinant CamA used in the study (12% SDS PAGE with Coomassie blue staining). We purified  $N = 7$  times used for enzyme assays and co-crystallizations. **b** Calibration curves for Promega bioluminescence assay as a function of SAH concentrations in the range of above or below  $1 \mu\text{M}$  (top and bottom panels) ( $N = 2$ ). **c** pH variation ( $N = 2$ ). **d** NaCl variation ( $N = 2$  or 4 as indicated by \*). **e** Reaction time variation ( $N = 2$ ). **f** Enzyme concentration variation ( $N = 2$ ). **g** Variation of pre-incubation time at room temperature ( $N = 2$ ). **h** Comparison of CamA activity on DNA oligo at  $37^\circ\text{C}$  and room temperature (RT;  $\sim 22^\circ\text{C}$ ) ( $N = 2$ ). For convenience, we used room temperature in this study even though CamA has a slightly higher activity at  $37^\circ\text{C}$ . Source data are provided as a Source Data file.

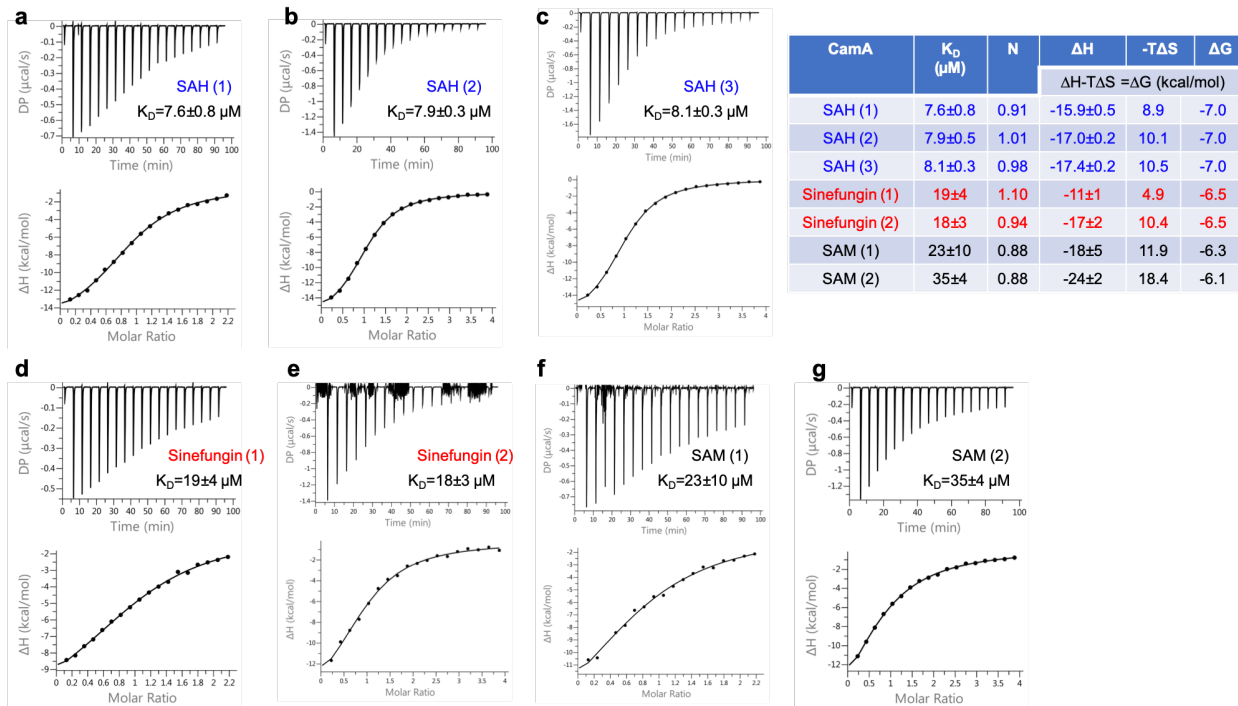

**Supplementary Fig 2.** Isothermal Titration Calorimetry measurements of binding affinity between CamA and cofactor. **a-c** SAH ( $N = 3$ ) with  $[E]=40 \mu\text{M}$  and  $[\text{SAH}]=450 \mu\text{M}$  (**a**) or  $[E]=45 \mu\text{M}$  and  $[\text{SAH}]=900 \mu\text{M}$  (**b-c**). (**D-E**) Sinefungin ( $N = 2$ ) with  $[E]=40 \mu\text{M}$  and  $[\text{sinefungin}]=450 \mu\text{M}$  (**d**) or  $[E]=45 \mu\text{M}$  and  $[\text{sinefungin}]=900 \mu\text{M}$  (**e**). **f-g** SAM ( $N = 2$ ) with  $[E]=40 \mu\text{M}$  and  $[\text{SAM}]=450 \mu\text{M}$  (**f**) or  $[E]=45 \mu\text{M}$  and  $[\text{SAM}]=900 \mu\text{M}$  (**g**). For each experiment, top panel shows the raw microcalorimetry data. The microcalorimeter measures all heat released during the binding until the binding reaction has reached equilibrium. Note that in some experiments we have air bubbles in the sample chamber. Bottom panel shows the enthalpy ( $\Delta H$ ) as the amount of heat released per mole of cofactor bound (kcal/mol). Tabular summary of derived binding affinity ( $K_D$ ), stoichiometry ( $N$ ) and enthalpy and entropy of the binding reaction is provided for each fitting.

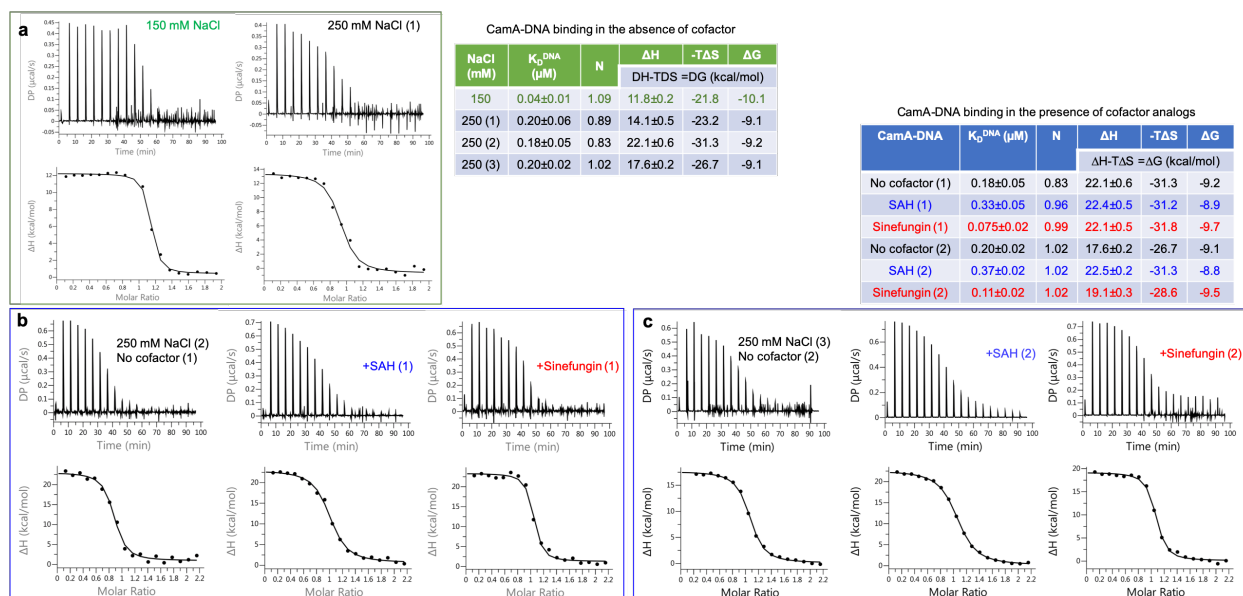

**Supplementary Fig 3.** Isothermal Titration Calorimetry measurements of binding affinity between CamA and DNA. **a** As a function of ionic strength with  $[E]=20 \mu\text{M}$  and  $[DNA]=200 \mu\text{M}$  ( $N = 3$  at 250 mM NaCl). **b-c** In the absence or presence of cofactor analog performed in 250 mM NaCl with  $[E]=18 \mu\text{M}$  and  $[DNA]=200 \mu\text{M}$  ( $N = 2$ ). Tabular summaries of derived binding affinity ( $K_D$ ), stoichiometry ( $N$ ) and entropy and enthalpy of the binding reaction are provided for each fitting.

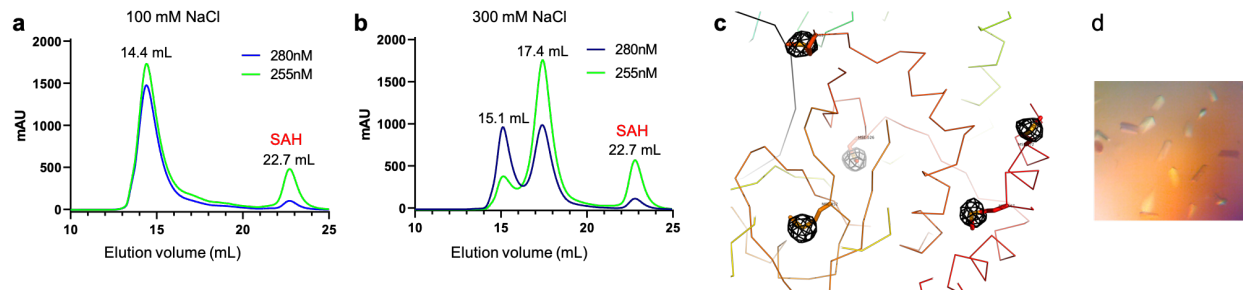

**Supplementary Fig. 4.** **a-b** Elution profiles of CamA-DNA complexes from sizing exclusion chromatography (Superdex 200 Increase 10/300 GL) under the buffer conditions of 100 mM NaCl (**a**) or 300 mM NaCl (**b**). The protein-DNA complex was stable under 100 mM NaCl, but SAH was dissociated. **c** The anomalous electron density, contoured at  $5\sigma$  above mean, shown for five SeMet residues of the C-terminal TRD domain. **d** Graph of the SeMet-substituted CamA-DNA crystals.

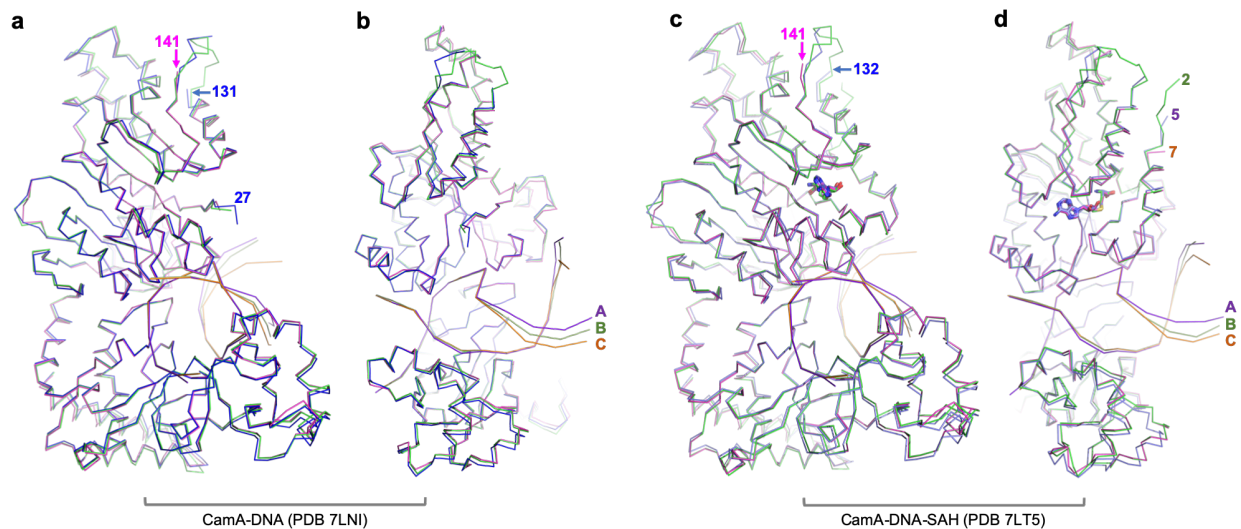

**Supplementary Fig. 5.** Structural comparison of three protein-DNA complexes per asymmetric unit in the space group  $P2_12_12_1$ . **a-b** Two views of protein-DNA complexes in the absence of SAH binding (PDB 7LNI). The largest difference in the protein components lie in the loop region 131-141 away from the protein-DNA interface (**a**), in addition to the disordered N-terminal residues (indicated by residue 27). The largest difference in the bound DNA components is located in the free end of dsDNA lacking any protein contact (**b**). **c-d** Two views of protein-DNA complexes in the presence of SAH (in stick model) (PDB 7LT5).

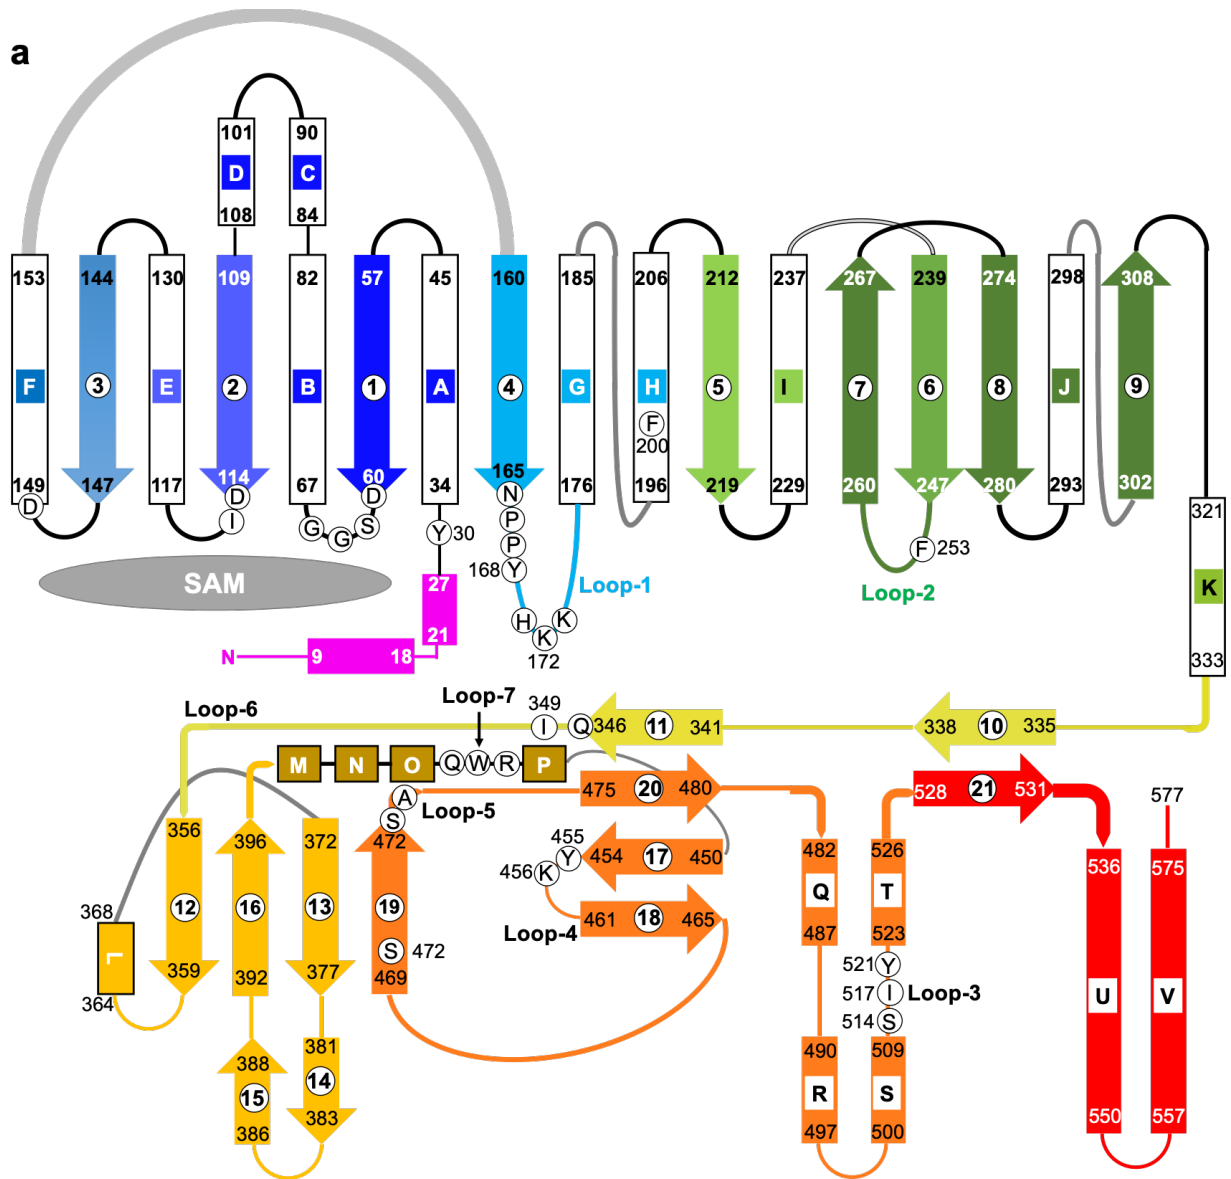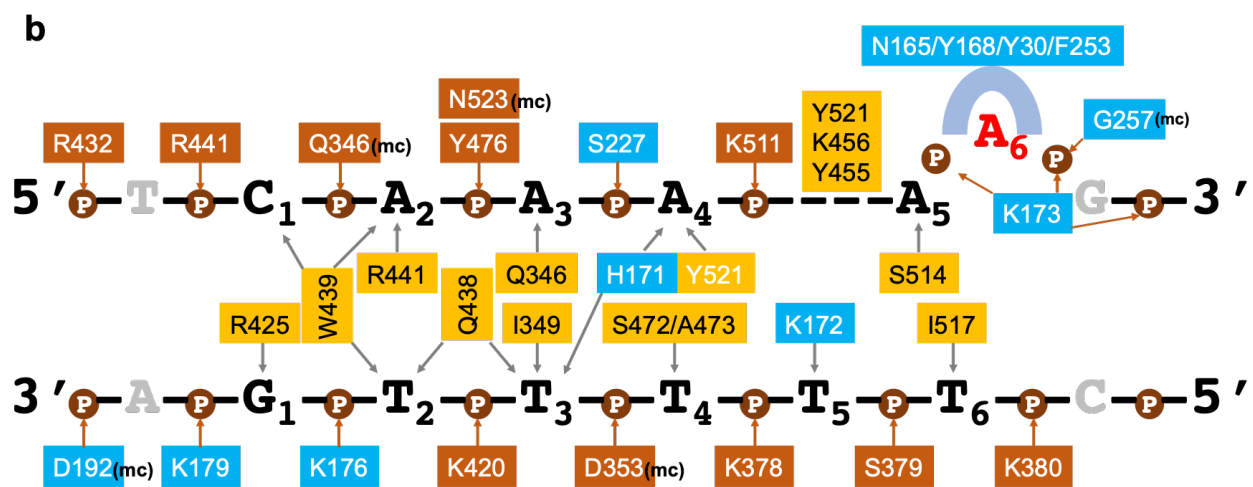

**Supplementary Fig. 6. a** Schematic diagram of CamA secondary structures, with N-terminal catalytic domain (blue-to-green) and C-terminal TRD (orange-to-red). Helices (rectangles) are labeled from A to V, and strands (arrows) are labeled as 1 to 21. Functional residues, most of them are located in loops L1-to-L7, are labeled with single-letter amino acid abbreviations within white circles. The N-terminal residues undergo conformational changes upon SAH binding are shown in magenta. **b** An enlarged version of schematic of CamA-DNA interactions: residues in cyan background are from the N-terminal catalytic domain, and residues in (light and dark) orange from the C-terminal TRD. The base-specific contacts are placed between the two strands and the phosphate contacts are depicted above or below the strand. mc, main-chain-atom-mediated contacts.



**Supplementary Table 1.** Summary of X-ray data collection and refinement statistics (\*)

| CamA                                                            | SeMet+DNA                                             | WT+DNA                                                | WT+DNA+SAH                                            |
|-----------------------------------------------------------------|-------------------------------------------------------|-------------------------------------------------------|-------------------------------------------------------|
| PDB ID                                                          | 7LNI                                                  | 7LNJ                                                  | 7LT5                                                  |
| Wavelength (Å)                                                  | 0.97795                                               | 1.00000                                               | 1.00000                                               |
| Space group                                                     | <i>P</i> 2 <sub>1</sub> 2 <sub>1</sub> 2 <sub>1</sub> | <i>P</i> 2 <sub>1</sub> 2 <sub>1</sub> 2 <sub>1</sub> | <i>P</i> 2 <sub>1</sub> 2 <sub>1</sub> 2 <sub>1</sub> |
| Cell dimensions (Å)                                             | 82.07, 160.99, 231.32                                 | 82.25, 161.36, 231.63                                 | 81.42, 160.86, 230.16                                 |
| Resolution (Å)                                                  | 40.76-2.69 (2.79-2.68)                                | 44.35-2.69 (2.79-2.68)                                | 45.10-2.54 (2.64-2.54)                                |
| <sup>a</sup> R <sub>merge</sub>                                 | 0.308 (0.902)                                         | 0.224 (0.940)                                         | 0.179 (0.948)                                         |
| R <sub>pim</sub>                                                | 0.053 (0.515)                                         | 0.068 (0.690)                                         | 0.058 (0.478)                                         |
| CC <sub>1/2</sub>                                               | (0.671)                                               | (0.384)                                               | (0.564)                                               |
| <sup>b</sup> <I/σI>                                             | 16.1 (1.7)                                            | 16.3 (0.9)                                            | 10.7 (1.4)                                            |
| Completeness (%)                                                | 99.9 (99.6)                                           | 87.8 (73.8)                                           | 88.8 (83.1)                                           |
| Redundancy                                                      | 32.9 (23.8)                                           | 10.3 (7.0)                                            | 9.1 (8.7)                                             |
| Observed reflections                                            | 2,825,594                                             | 783,940                                               | 802,514                                               |
| Unique reflections                                              | 85,923 (8,447)                                        | 76,108 (6,312)                                        | 88,557 (8,168)                                        |
|                                                                 | (78,411 have both I+ and I-)                          |                                                       |                                                       |
| Mean FOM (SAD)                                                  | 0.238                                                 |                                                       |                                                       |
| R-Factor                                                        | 0.24                                                  |                                                       |                                                       |
| (density modification)                                          |                                                       |                                                       |                                                       |
| <b>Refinement</b>                                               |                                                       |                                                       |                                                       |
| Resolution (Å)                                                  | 2.68                                                  | 2.68                                                  | 2.54                                                  |
| No. reflections                                                 | 164,196                                               | 75,973                                                | 88,478                                                |
|                                                                 | (85,819 non-anomalous)                                |                                                       |                                                       |
| <sup>c</sup> R <sub>work</sub> / <sup>d</sup> R <sub>free</sub> | 0.203 / 0.223                                         | 0.210 / 0.251                                         | 0.176/0.212                                           |
| No. Atoms                                                       |                                                       |                                                       |                                                       |
| Protein                                                         | 13,371                                                | 13,247                                                | 13,908                                                |
| DNA                                                             | 1704                                                  | 1686                                                  | 1686                                                  |
| Solvent                                                         | 278                                                   | 124                                                   | 371                                                   |
| SAH                                                             | -                                                     | -                                                     | 78                                                    |
| B Factors (Å <sup>2</sup> )                                     |                                                       |                                                       |                                                       |
| Protein                                                         | 55.7                                                  | 63.4                                                  | 49.5                                                  |
| DNA                                                             | 60.3                                                  | 67.3                                                  | 55.1                                                  |
| Solvent                                                         | 39.0                                                  | 45.3                                                  | 37.8                                                  |
| SAH                                                             | -                                                     | -                                                     | 47.8                                                  |
| <b>R.m.s. deviations</b>                                        |                                                       |                                                       |                                                       |
| Bond lengths (Å)                                                | 0.002                                                 | 0.002                                                 | 0.002                                                 |
| Bond angles (°)                                                 | 0.4                                                   | 0.4                                                   | 0.5                                                   |

\* Values in parenthesis correspond to highest resolution shell;

<sup>a</sup> R<sub>merge</sub>=Σ|I-<I>|/ΣI, where I is the observed intensity and <I> is the averaged intensity from multiple observations;

<sup>b</sup> <I/σI> =averaged ratio of the intensity (I) to the error of the intensity (σI);

<sup>c</sup> R<sub>work</sub>=Σ|Fo-Fc|/Σ|Fo|, where Fo and Fc are the observed and calculated structure factors;

<sup>d</sup> R<sub>free</sub> was calculated using a randomly chosen subset (5%) of the reflections not used in refinement.

**Supplementary Fig. 7.** Sequence alignment of CamA orthologs (see following pages).

Only compared CamA orthologs that were nonidentical to the query, in order to more sensitively detect sequence variation. Substitutions are highlighted in cyan, DNA recognition residues in magenta, and universally-conserved residues (with roles as labeled and described in the text) in yellow. The boundary between the catalytic domain and target recognition domain (TRD) is also indicated.











|                |     | 530                                | 540            | 550    | 560 | 570 |  |
|----------------|-----|------------------------------------|----------------|--------|-----|-----|--|
| Query          | 527 | KIRIFRDNNYEEIENLSKQIISILLNKSIDKGV  | VEKLEKLIKMDNLI | MSLGI  | 577 |     |  |
| WP_054274745.1 | 527 | KIRIFRDNNYEEIENLSKQIISILLNKSIDKGV  | VEKLEKLIKMDNLI | MSLGI  | 577 |     |  |
| VIB38147.1     | 527 | KIRIFRDNNYDEIENLSKQIISILLNKSIDKGV  | VEKLEKLIKMDNLI | MSLGI  | 577 |     |  |
| WP_009906092.1 | 527 | KIRIFRDNNYDEIENLSKQIISILLNKSIDKGV  | VEKLEKLIKMDNLI | MSLGI  | 577 |     |  |
| WP_003422891.1 | 527 | KIRIFRDNNYDEIENLSKQIISILLNKSIDKGV  | VEKLEKLIKMDNLI | MSLGI  | 577 |     |  |
| WP_107616100.1 | 527 | KIRIFRDNNYDEIENLSKQIISILLNKSIDKGV  | VEKLEKLIKMDNLI | MSLGI  | 577 |     |  |
| VIF75342.1     | 527 | KIRIFRDNNYDEIENLSKQIISILLNKSIDKGV  | VEKLEKLIKMDNLI | MSLGI  | 577 |     |  |
| WP_107619286.1 | 527 | KIRIFRDNNYDEIENLSKQIISILLNKSIDKGV  | VEKLEKLIKMDNLI | MSLGI  | 577 |     |  |
| WP_133143045.1 | 527 | KIRIFRDNNYDEIENLSKQIISILLNKSIDKGV  | VEKLEKLIKMDNLI | MSLGI  | 577 |     |  |
| EGT2204202.1   | 527 | KIRIFRDNNYDEIENLSKQIISILLNKSIDKGV  | VEKLEKLIKMDNLI | MSLGI  | 577 |     |  |
| WP_131040770.1 | 527 | KIRIFRDNNYDEIENLSKQIISILLNKSIDKGV  | VEKLEKLIKMDNLI | MSLGI  | 577 |     |  |
| WP_021385685.1 | 527 | KIRIFRDNNYEEIEISLSRQIISILLNKSIDKGV | VEKLEKLIKMDNLI | MSLGI  | 577 |     |  |
| WP_054277349.1 | 527 | KIRIFRDNNYEEIEISLSKEIISILLNNSVDKEK | VERLQIKMDNLI   | MNSLGI | 577 |     |  |
| WP_167640826.1 | 527 | KIRIFRDNNYEEIEISLSKEIISILLNNSVDKEK | VERLQIKMDNLI   | MNSLGI | 577 |     |  |
| WP_074178811.1 | 527 | KIRIFRDNNYEEIEISLSKEIISILLNNSVDKEK | VERLQIKMDNLI   | MNSLGI | 577 |     |  |
| NJI79135.1     | 527 | KIRIFRDNNYEEIEISLSKEIISILLNNSVDKEK | VERLQIKMDNLI   | MNSLGI | 577 |     |  |
| WP_169469916.1 | 527 | KIRIFRDNNYEEIEISLSKQIISILLNNSIDKGV | EMLQIKMDNLI    | MSLGI  | 577 |     |  |
| WP_054271332.1 | 527 | KIRIFRDNNYEEIEISLSKEIISILLNNSVDKEK | VERLQIKMDNLI   | MNSLGI | 577 |     |  |
| EGT4516689.1   | 527 | KIRIFRDNNYEEIENLSKQIISILLNKSIDKGV  | VEKLEKLIKMDNLI | 571    |     |     |  |
| MBH7490777.1   | 527 | KIRIFRDNNYEEIENLSKQIISILLNKSIDKGV  | VEKLEKLIKMDNLI | 571    |     |     |  |
| EGT4155821.1   | 527 | KIRIFRDNNYEEIENLSKQIISILLNKSIDKGV  | VEKLEKLIKMDN   | 569    |     |     |  |
| MBH7182547.1   | 527 | KIRIFRDNNYEEIENLSKQIISILLNKSIDKGV  | VEKLEKLIKMDN   | 563    |     |     |  |
| MBF9877285.1   | 527 | KIRIFRDNNYEEIENLSKQIISILLNKSIDKGV  | VEKLEKLIKMDN   | 562    |     |     |  |
| MBG0179561.1   | 527 | KIRIFRDNNYEEIENLSKQIISILLNKSIDKGV  | VEKLEKLIKMDN   | 561    |     |     |  |
| MBG0197089.1   | 527 | KIRIFRDNNYEEIENLSKQIISILLNKSIDKGV  | VEKLEKLIKMDN   | 560    |     |     |  |
| EGT3970705.1   | 527 | KIRIFRDNNYEEIENLSKQIISILLNKSIDKGV  | VEKLEKLIKMDN   | 558    |     |     |  |
| MBG0131288.1   | 527 | KIRIFRDNNYEEIENLSKQIISILLNKSIDKGV  | VEKLEKLIKMDN   | 557    |     |     |  |
| EGT4149356.1   | 527 | KIRIFRDNNYEEIENLSKQIISILLNKSIDKGV  | VEKLEKLIKMDN   | 546    |     |     |  |
| EGT3786504.1   | 527 | KIRIFRDNNYEEIENLSKQIISILLNKSIDKGV  | VEKLEKLIKMDN   | 540    |     |     |  |
| HAU4954234.1   | 527 | KIRIFRDNNYEEIE                     | 540            |        |     |     |  |
| WP_131072671.1 | 527 | KIRIFRD                            | 533            |        |     |     |  |
| EGT4119714.1   | 527 | KIRIFR                             | 532            |        |     |     |  |
| WP_131036696.1 | 527 | KIRI                               | 530            |        |     |     |  |
| EGT5091780.1   | 527 | KI                                 | 528            |        |     |     |  |
